# Supplementary material
Source: PubMed Central journal article supplement (PMC8320732)
Supplement: NIHMS1669579-supplement-Supplementary_material.pdf [file NIHMS1669579-supplement-Supplementary_material.pdf]

**Supplemental materials: Performance-weighted-voting  
model: an ensemble machine learning method for cancer  
type classification using whole-exome sequencing mutation**

Yawei Li<sup>1</sup>, Yuan Luo<sup>1\*</sup>

<sup>1</sup> Department of Preventive Medicine, Northwestern University, Feinberg School of Medicine, Chicago,  
IL, USA

\* Correspondence: [yuan.luo@northwestern.edu](mailto:yuan.luo@northwestern.edu)

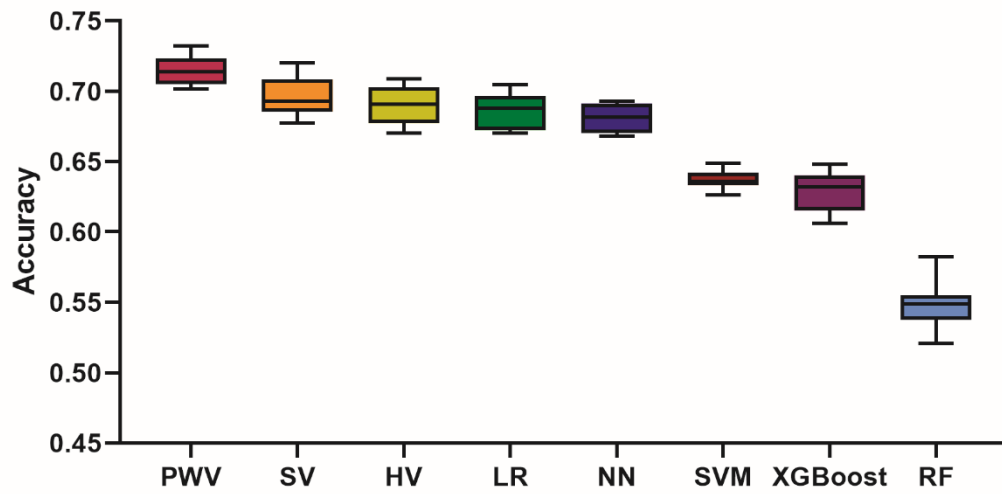

**Figure S1.** The predictive performance of the performance-weighted-voting model compared with the other models. Hard-voting model (HV, yellow box), soft-voting model (SV, orange box) and performance-weighted-voting model (PWV, violet red box) were introduced compared with the five weak classifiers. Each model was trained and predicted 10 times independently.

**Table S1:** The precision, recall and F1-score of the eight models.

|                                    |                  | BLCA                               | BRCA     | GBM      | HNSC     | KIRC     | LGG      | LIHC     | LUAD     | LUSC     | PRAD     | SKCM     | STAD      | THCA     | UCEC     |
|------------------------------------|------------------|------------------------------------|----------|----------|----------|----------|----------|----------|----------|----------|----------|----------|-----------|----------|----------|
| <b>Logistic Regression</b>         | <b>precision</b> | 72% <sup>a</sup> ± 5% <sup>b</sup> | 61% ± 3% | 60% ± 4% | 56% ± 5% | 85% ± 3% | 88% ± 2% | 71% ± 4% | 74% ± 4% | 73% ± 5% | 46% ± 5% | 94% ± 2% | 66% ± 6%  | 70% ± 5% | 79% ± 4% |
|                                    | <b>recall</b>    | 61% ± 4%                           | 66% ± 3% | 63% ± 5% | 58% ± 5% | 69% ± 6% | 82% ± 3% | 58% ± 6% | 59% ± 4% | 70% ± 4% | 70% ± 5% | 79% ± 3% | 49% ± 6%  | 92% ± 1% | 76% ± 5% |
|                                    | <b>F1-score</b>  | 66% ± 3%                           | 63% ± 2% | 61% ± 4% | 57% ± 4% | 76% ± 4% | 85% ± 2% | 64% ± 4% | 65% ± 3% | 72% ± 4% | 56% ± 3% | 86% ± 2% | 56% ± 4%  | 79% ± 3% | 77% ± 3% |
| <b>SVM</b>                         | <b>precision</b> | 64% ± 2%                           | 44% ± 3% | 68% ± 6% | 52% ± 3% | 89% ± 3% | 94% ± 2% | 70% ± 8% | 78% ± 7% | 65% ± 5% | 41% ± 4% | 98% ± 2% | 67% ± 8%  | 76% ± 5% | 86% ± 5% |
|                                    | <b>recall</b>    | 54% ± 3%                           | 66% ± 5% | 48% ± 6% | 50% ± 4% | 61% ± 6% | 79% ± 3% | 46% ± 5% | 44% ± 5% | 71% ± 4% | 77% ± 6% | 76% ± 3% | 40% ± 5%  | 94% ± 2% | 68% ± 5% |
|                                    | <b>F1-score</b>  | 58% ± 2%                           | 52% ± 3% | 56% ± 6% | 51% ± 2% | 72% ± 5% | 86% ± 2% | 55% ± 5% | 56% ± 4% | 68% ± 4% | 53% ± 3% | 85% ± 2% | 49% ± 4%  | 84% ± 4% | 76% ± 4% |
| <b>Random Forest</b>               | <b>precision</b> | 65% ± 6%                           | 71% ± 4% | 41% ± 6% | 64% ± 4% | 79% ± 5% | 74% ± 8% | 64% ± 5% | 73% ± 5% | 45% ± 4% | 36% ± 4% | 68% ± 7% | 53% ± 12% | 34% ± 6% | 80% ± 7% |
|                                    | <b>recall</b>    | 54% ± 7%                           | 45% ± 3% | 47% ± 6% | 29% ± 5% | 69% ± 7% | 82% ± 2% | 39% ± 5% | 33% ± 6% | 83% ± 4% | 29% ± 8% | 76% ± 3% | 10% ± 4%  | 99% ± 1% | 67% ± 3% |
|                                    | <b>F1-score</b>  | 59% ± 6%                           | 55% ± 3% | 43% ± 5% | 39% ± 5% | 73% ± 6% | 78% ± 5% | 48% ± 5% | 45% ± 6% | 58% ± 3% | 32% ± 5% | 71% ± 5% | 17% ± 6%  | 51% ± 6% | 73% ± 5% |
| <b>XGBoost</b>                     | <b>precision</b> | 68% ± 6%                           | 56% ± 2% | 46% ± 5% | 55% ± 4% | 82% ± 6% | 87% ± 3% | 65% ± 5% | 61% ± 5% | 59% ± 5% | 39% ± 5% | 86% ± 2% | 50% ± 7%  | 74% ± 4% | 80% ± 4% |
|                                    | <b>recall</b>    | 58% ± 6%                           | 67% ± 3% | 41% ± 6% | 51% ± 5% | 69% ± 6% | 85% ± 3% | 52% ± 6% | 52% ± 5% | 61% ± 5% | 67% ± 4% | 76% ± 3% | 32% ± 5%  | 77% ± 3% | 73% ± 4% |
|                                    | <b>F1-score</b>  | 62% ± 5%                           | 61% ± 2% | 43% ± 5% | 52% ± 4% | 75% ± 6% | 86% ± 2% | 57% ± 5% | 56% ± 3% | 60% ± 4% | 49% ± 5% | 81% ± 2% | 39% ± 4%  | 75% ± 3% | 76% ± 2% |
| <b>Neural Network</b>              | <b>precision</b> | 67% ± 4%                           | 64% ± 3% | 57% ± 3% | 57% ± 5% | 85% ± 3% | 90% ± 3% | 67% ± 5% | 67% ± 4% | 70% ± 4% | 45% ± 4% | 93% ± 2% | 60% ± 5%  | 76% ± 5% | 80% ± 5% |
|                                    | <b>recall</b>    | 60% ± 5%                           | 63% ± 3% | 60% ± 4% | 54% ± 3% | 70% ± 6% | 82% ± 3% | 58% ± 4% | 58% ± 4% | 73% ± 4% | 72% ± 4% | 81% ± 2% | 52% ± 5%  | 90% ± 2% | 74% ± 6% |
|                                    | <b>F1-score</b>  | 63% ± 4%                           | 64% ± 2% | 58% ± 3% | 55% ± 3% | 76% ± 4% | 86% ± 2% | 62% ± 3% | 62% ± 2% | 71% ± 3% | 55% ± 3% | 86% ± 1% | 56% ± 4%  | 83% ± 3% | 77% ± 3% |
| <b>Hard-Voting</b>                 | <b>precision</b> | 72% ± 5%                           | 61% ± 5% | 59% ± 5% | 58% ± 5% | 88% ± 4% | 90% ± 2% | 75% ± 5% | 74% ± 4% | 67% ± 7% | 45% ± 4% | 94% ± 3% | 71% ± 7%  | 72% ± 5% | 86% ± 5% |
|                                    | <b>recall</b>    | 63% ± 5%                           | 67% ± 3% | 60% ± 7% | 56% ± 4% | 69% ± 5% | 82% ± 3% | 59% ± 6% | 55% ± 5% | 76% ± 4% | 74% ± 6% | 79% ± 2% | 45% ± 6%  | 93% ± 1% | 77% ± 4% |
|                                    | <b>F1-score</b>  | 67% ± 4%                           | 64% ± 2% | 59% ± 5% | 57% ± 3% | 78% ± 4% | 86% ± 2% | 66% ± 4% | 63% ± 3% | 71% ± 4% | 56% ± 3% | 86% ± 2% | 55% ± 5%  | 81% ± 3% | 81% ± 3% |
| <b>Soft-Voting</b>                 | <b>precision</b> | 71% ± 4%                           | 61% ± 4% | 59% ± 5% | 58% ± 5% | 88% ± 3% | 89% ± 2% | 74% ± 5% | 73% ± 6% | 69% ± 6% | 46% ± 4% | 94% ± 3% | 67% ± 6%  | 73% ± 6% | 86% ± 5% |
|                                    | <b>recall</b>    | 63% ± 5%                           | 68% ± 2% | 59% ± 6% | 56% ± 4% | 70% ± 6% | 83% ± 3% | 59% ± 5% | 57% ± 6% | 75% ± 5% | 73% ± 4% | 80% ± 2% | 46% ± 6%  | 93% ± 2% | 76% ± 4% |
|                                    | <b>F1-score</b>  | 67% ± 4%                           | 64% ± 2% | 59% ± 5% | 57% ± 3% | 78% ± 4% | 86% ± 2% | 65% ± 4% | 64% ± 2% | 72% ± 4% | 56% ± 3% | 86% ± 2% | 54% ± 4%  | 82% ± 4% | 81% ± 3% |
| <b>Performance-Weighted-Voting</b> | <b>precision</b> | 72% ± 4%                           | 69% ± 2% | 61% ± 4% | 58% ± 4% | 88% ± 2% | 91% ± 3% | 62% ± 4% | 73% ± 5% | 74% ± 5% | 48% ± 4% | 94% ± 2% | 60% ± 6%  | 80% ± 3% | 85% ± 4% |
|                                    | <b>recall</b>    | 65% ± 5%                           | 62% ± 2% | 66% ± 7% | 59% ± 4% | 72% ± 7% | 83% ± 3% | 69% ± 4% | 60% ± 4% | 71% ± 3% | 78% ± 5% | 81% ± 2% | 57% ± 7%  | 93% ± 2% | 79% ± 4% |
|                                    | <b>F1-score</b>  | 68% ± 3%                           | 66% ± 2% | 63% ± 5% | 60% ± 3% | 79% ± 5% | 87% ± 2% | 65% ± 2% | 66% ± 3% | 72% ± 2% | 60% ± 3% | 87% ± 2% | 58% ± 4%  | 86% ± 2% | 82% ± 3% |

<sup>a</sup> The average number of 10 repeats

<sup>b</sup> The standard deviation of 10 repeats

**Table S2:** 52 misclassification cases that received the same predictions from five classifiers

| <b>Case ID</b> | <b>Cancer Type</b> | <b>Performance-weighted-voting</b> |
|----------------|--------------------|------------------------------------|
| TCGA-FD-A3B7   | BLCA               | BRCA                               |
| TCGA-XF-AAMH   | BLCA               | LIHC                               |
| TCGA-A7-A0CH   | BRCA               | THCA                               |
| TCGA-A2-A25F   | BRCA               | THCA                               |
| TCGA-76-6193   | GBM                | BRCA                               |
| TCGA-26-1442   | GBM                | LGG                                |
| TCGA-06-5417   | GBM                | LGG                                |
| TCGA-32-4208   | GBM                | LGG                                |
| TCGA-14-4157   | GBM                | LGG                                |
| TCGA-CR-7368   | HNSC               | BLCA                               |
| TCGA-MT-A7BN   | HNSC               | GBM                                |
| TCGA-CR-7371   | HNSC               | LUSC                               |
| TCGA-DQ-5629   | HNSC               | LUSC                               |
| TCGA-CR-7370   | HNSC               | LUSC                               |
| TCGA-CN-6020   | HNSC               | LUSC                               |
| TCGA-CR-7398   | HNSC               | LUSC                               |
| TCGA-CV-A45W   | HNSC               | LUSC                               |
| TCGA-CV-5443   | HNSC               | PRAD                               |
| TCGA-HD-A634   | HNSC               | PRAD                               |
| TCGA-BP-5010   | KIRC               | GBM                                |
| TCGA-BP-5199   | KIRC               | UCEC                               |
| TCGA-VM-A8C9   | LGG                | BRCA                               |
| TCGA-HT-8110   | LGG                | GBM                                |
| TCGA-TM-A7C3   | LGG                | GBM                                |
| TCGA-QH-A6CX   | LGG                | GBM                                |
| TCGA-DU-7292   | LGG                | GBM                                |
| TCGA-WJ-A86L   | LIHC               | HNSC                               |
| TCGA-XR-A8TG   | LIHC               | HNSC                               |
| TCGA-LG-A9QC   | LIHC               | KIRC                               |
| TCGA-DD-A4NA   | LIHC               | LGG                                |
| TCGA-97-8177   | LUAD               | GBM                                |
| TCGA-55-A57B   | LUAD               | LGG                                |
| TCGA-L9-A743   | LUAD               | LUSC                               |
| TCGA-55-8301   | LUAD               | LUSC                               |
| TCGA-69-8255   | LUAD               | LUSC                               |
| TCGA-22-4605   | LUSC               | HNSC                               |
| TCGA-63-6202   | LUSC               | LUAD                               |
| TCGA-HC-A9TH   | PRAD               | BRCA                               |
| TCGA-J9-A8CL   | PRAD               | BRCA                               |
| TCGA-EJ-7125   | PRAD               | LGG                                |
| TCGA-KK-A6E7   | PRAD               | LGG                                |
| TCGA-EJ-A8FU   | PRAD               | THCA                               |
| TCGA-FW-A3I3   | SKCM               | GBM                                |
| TCGA-FS-A1ZU   | SKCM               | PRAD                               |
| TCGA-CG-5722   | STAD               | BRCA                               |
| TCGA-D7-6518   | STAD               | BRCA                               |
| TCGA-BR-A4J9   | STAD               | BRCA                               |
| TCGA-BR-8592   | STAD               | BRCA                               |
| TCGA-D7-8573   | STAD               | LIHC                               |
| TCGA-VQ-A8PJ   | STAD               | LUSC                               |
| TCGA-D1-A1NX   | UCEC               | BRCA                               |
| TCGA-B5-A5OE   | UCEC               | HNSC                               |
